# Supplementary material
Source: Springer Nature journal article supplement (https://www.springermedizin.de/resource/supplementary/12943_2014_1418_MOESM7_ESM.pdf/9552930)

**A**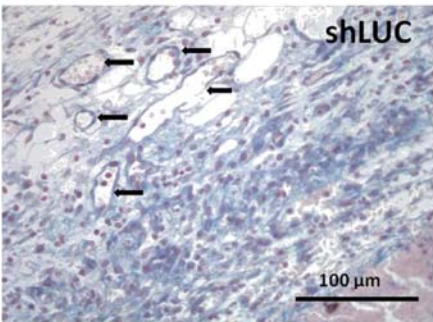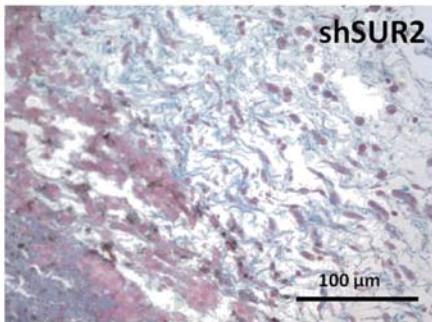

Microvessel density

shLUC

+

shSUR2

-

shLUC

-

+

**B**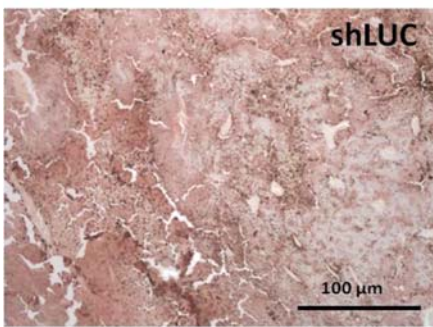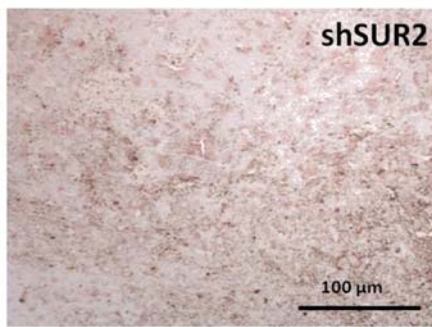

VEGF Expression

shLUC

+

shSUR2

-

shLUC

-

+

Supplement: MOESM7 [file 9552930]
